# Supplementary material
Source: PubMed Central journal article supplement (PMC5570473)

# Supplementary Information

## Capzimin is a potent and specific inhibitor of proteasome isopeptidase Rpn11

Jing Li<sup>1</sup>, Tanya Yakushi<sup>2</sup>, Francesco Parlati<sup>1, 8</sup>, Andrew L. Mackinnon<sup>1, 8</sup>, Christian Perez<sup>3</sup>, Yuyong Ma<sup>3</sup>, Kyle P. Carter<sup>4</sup>, Sharon Colayco<sup>5</sup>, Gavin Magnuson<sup>5</sup>, Brock Brown<sup>5</sup>, Kevin Nguyen<sup>6</sup>, Stefan Vasile<sup>6</sup>, Eigo Suyama<sup>6</sup>, Layton H. Smith<sup>6</sup>, Eduard Sergienko<sup>5</sup>, Anthony B. Pinkerton<sup>5</sup>, Thomas D.Y. Chung<sup>5</sup>, Amy E. Palmer<sup>4</sup>, Ian Pass<sup>5</sup>, Sonja Hess<sup>2</sup>, Seth M. Cohen<sup>3</sup> and Raymond J. Deshaies<sup>\*,1,7</sup>

<sup>1</sup>Division of Biology and Biological Engineering, Box 114-96, California Institute of Technology, Pasadena CA 91125

<sup>2</sup>Proteome Exploration Laboratory, Beckman Institute, California Institute of Technology, Pasadena, CA 91125

<sup>3</sup>Department of Chemistry and Biochemistry, University of California San Diego, La Jolla CA 92093

<sup>4</sup>Chemistry and Biochemistry, UCB 596, University of Colorado, Boulder, CO 80309

<sup>5</sup>Conrad Prebys Center for Chemical Genomics at Sanford Burnham Prebys Medical Discovery Institute, 10901 North Torrey Pines Rd, Building 2, La Jolla CA 92037

<sup>6</sup>Sanford-Burnham Center for Chemical Genomics at Sanford-Burnham Medical Research Institute Lake Nona, Orlando, Florida 32827, USA

<sup>7</sup>Howard Hughes Medical Institute

<sup>8</sup>present address: Calithera Biosciences Inc., 343 Oyster Point Blvd. Suite 200, South San Francisco, CA 94080

# Supplementary Results

**Supplementary Table 1. Small molecule screening data**

| Category          | Parameter                           | Description                                                                                                                                                                                                                                                                                                                                                                                                                                                                                                                                                                                                                                                                                                                                                                                                                                                                                                                                                                                                                                             |
|-------------------|-------------------------------------|---------------------------------------------------------------------------------------------------------------------------------------------------------------------------------------------------------------------------------------------------------------------------------------------------------------------------------------------------------------------------------------------------------------------------------------------------------------------------------------------------------------------------------------------------------------------------------------------------------------------------------------------------------------------------------------------------------------------------------------------------------------------------------------------------------------------------------------------------------------------------------------------------------------------------------------------------------------------------------------------------------------------------------------------------------|
| Assay             | Type of assay                       | In vitro biochemical assay                                                                                                                                                                                                                                                                                                                                                                                                                                                                                                                                                                                                                                                                                                                                                                                                                                                                                                                                                                                                                              |
|                   | Target                              | Rpn11 (NCBI Protein ID: PSMD14; Gene ID: 10213)                                                                                                                                                                                                                                                                                                                                                                                                                                                                                                                                                                                                                                                                                                                                                                                                                                                                                                                                                                                                         |
|                   | Primary measurement                 | Fluorescent Polarization                                                                                                                                                                                                                                                                                                                                                                                                                                                                                                                                                                                                                                                                                                                                                                                                                                                                                                                                                                                                                                |
|                   | Key reagents                        | Ub4-pepOG protein substrate, 26S proteasome from human erythrocytes                                                                                                                                                                                                                                                                                                                                                                                                                                                                                                                                                                                                                                                                                                                                                                                                                                                                                                                                                                                     |
|                   | Assay protocol                      | See PubChem Bioassay: AID 588493 ( <a href="https://pubchem.ncbi.nlm.nih.gov/bioassay/588493">https://pubchem.ncbi.nlm.nih.gov/bioassay/588493</a> )<br>In summary: uHTS Procedure<br>1) Using LabCyte Echo, transfer 40 nL of test compounds from a 2 mM compound source plate into assay plate Cols. 5-48 (final concentration of test compounds is 20 uM, 1 % DMSO). Transfer 40 nL of 100% DMSO into assay plate Col. 1-4.<br>2) Pre-incubate 20nM 26S proteasome in Epoxomicin Solution at room temperature for 1 hour, then dilute 10-fold in pre-chilled 1x Assay Buffer.<br>3) Using Beckman BiorapTR dispense 2uL of Assay Buffer in columns 1 and 2, and 2uL of 26S proteasome solution to columns 3-48.<br>4) Using Beckman BiorapTR dispense 2ul of Ub4-pepOG substrate into all wells (columns 1-48)<br>5) Spin plates at 1500 rpm for 1 minute on Eppendorf centrifuge 5810.<br>6) Incubate for 80 minutes at room temp.<br>7) Read plates on Perkin Elmer Envision with dual mirror at Ex/Em 480/535 nm in fluorescent polarization mode |
| Library           | Library size                        | 359.521                                                                                                                                                                                                                                                                                                                                                                                                                                                                                                                                                                                                                                                                                                                                                                                                                                                                                                                                                                                                                                                 |
|                   | Source                              | Molecular Libraries Small Molecules Repository Library (MLPCN, NIH)                                                                                                                                                                                                                                                                                                                                                                                                                                                                                                                                                                                                                                                                                                                                                                                                                                                                                                                                                                                     |
| Screen            | Format                              | 1,536 Well Plate Format                                                                                                                                                                                                                                                                                                                                                                                                                                                                                                                                                                                                                                                                                                                                                                                                                                                                                                                                                                                                                                 |
|                   | Concentration(s) tested             | 20 $\mu$ M                                                                                                                                                                                                                                                                                                                                                                                                                                                                                                                                                                                                                                                                                                                                                                                                                                                                                                                                                                                                                                              |
|                   | Reagent/ compound dispensing system | Labcyte Echo, Beckman Bioraptr                                                                                                                                                                                                                                                                                                                                                                                                                                                                                                                                                                                                                                                                                                                                                                                                                                                                                                                                                                                                                          |
|                   | Detection instrument and software   | PerkinElmer Envision                                                                                                                                                                                                                                                                                                                                                                                                                                                                                                                                                                                                                                                                                                                                                                                                                                                                                                                                                                                                                                    |
|                   | Assay validation/QC                 | Z'=0.63, signal to background = 1.6 fold, signal to noise = 12.5 fold, 5.9 signal window                                                                                                                                                                                                                                                                                                                                                                                                                                                                                                                                                                                                                                                                                                                                                                                                                                                                                                                                                                |
|                   | Correction factors                  | None                                                                                                                                                                                                                                                                                                                                                                                                                                                                                                                                                                                                                                                                                                                                                                                                                                                                                                                                                                                                                                                    |
|                   | Normalization                       | None                                                                                                                                                                                                                                                                                                                                                                                                                                                                                                                                                                                                                                                                                                                                                                                                                                                                                                                                                                                                                                                    |
| Post-HTS analysis | Hit criteria                        | $\geq 40$ % of inhibitory activity compared to the DMSO controls                                                                                                                                                                                                                                                                                                                                                                                                                                                                                                                                                                                                                                                                                                                                                                                                                                                                                                                                                                                        |
|                   | Hit rate                            | 0.55%                                                                                                                                                                                                                                                                                                                                                                                                                                                                                                                                                                                                                                                                                                                                                                                                                                                                                                                                                                                                                                                   |
|                   | Additional assay(s)                 | (1) Against an out-of-family thrombin metalloprotease for selectivity and possible interference with the fluorescence polarization readout. (AID: <a href="#">602333</a> ). (2) against MMP2 metalloprotease to exclude nonselective and potential likely Zn <sup>2+</sup> chelators (AID: <a href="#">602330</a> ).                                                                                                                                                                                                                                                                                                                                                                                                                                                                                                                                                                                                                                                                                                                                    |

**Supplementary Table 2. 8TQ and Capzimin are uncompetitive inhibitors of Rpn11 (proteasome holoenzyme)**

| Michaelis-Menten parameters |             |             |             |            |
|-----------------------------|-------------|-------------|-------------|------------|
| 8TQ                         | 10 $\mu$ M  | 5 $\mu$ M   | 2.5 $\mu$ M | 0          |
| V <sub>max</sub> ±S.E.      | 25.84±3.37  | 72.84±4.5   | 114.4±4.02  | 140.1±1.8  |
| K <sub>m</sub> ±S.E.        | 0.36±0.16   | 0.49±0.09   | 0.77±0.07   | 0.82±0.03  |
| CZM                         | 3.3 $\mu$ M | 1.7 $\mu$ M | 0.3 $\mu$ M | 0          |
| V <sub>max</sub> ±S.E.      | 63.81±4.05  | 106.3±1.19  | 139.5±3.37  | 172.7±3.29 |
| K <sub>m</sub> ±S.E.        | 0.41±0.12   | 0.66±0.03   | 0.80±0.07   | 1.03±0.07  |

**Supplementary Table 3. Summary of Capzimin's IC50 on metalloenzymes**

| <b>IC50 (<math>\mu</math>M) of Capzimin on other metalloenzymes</b> |              |               |              |                |
|---------------------------------------------------------------------|--------------|---------------|--------------|----------------|
| <b>HDAC6</b>                                                        | <b>MMP 2</b> | <b>MMP 12</b> | <b>hCAII</b> | <b>GLO1</b>    |
| >200                                                                | >50          | >50           | >50          | 42.8 $\pm$ 2.2 |

**Supplementary Table 4. A subset of 3021-resistant clones have elevated proteasome activity and increased resistance to carfilzomib.**

|        | 3021 IC <sub>50</sub> (μM) | CFZ IC <sub>50</sub> (nM) | Peptidase activity (LLVY-AMC) |
|--------|----------------------------|---------------------------|-------------------------------|
| HCT116 | 2.2                        | 7.1                       | 100%                          |
| Line 4 | 5.3                        | 60                        | 144%                          |
| Line 5 | 2.7                        | 11                        | 127%                          |
| Line 6 | 6.2                        | 45                        | 130%                          |
| Line 9 | 4.2                        | 16                        | 153%                          |

**Supplementary Table 5. Antibodies used in this study**

| Antibody      | Vendor and catalog No.     | Applications |
|---------------|----------------------------|--------------|
| Ubiquitin pAb | Enzo, ADI-SPA-200-F        | WB           |
| Nrf2          | Santa Cruz, sc-365949      | WB           |
| Cul1          | Life Technologies, 32-2400 | WB           |
| Actin         | Santa Cruz, sc-1616        | WB           |
| Ubiquitin     | Santa Cruz, Sc-8017        | IF           |
| HDAC6         | Cell Signaling, 7558S      | IF           |
| SQSTM1        | Santa Cruz, sc-25575       | IF           |
| HIF1          | BD bioscience, 610959      | WB           |
| p53           | Cell Signaling, 2524S      | WB           |
| PERK          | Cell Signaling, 5683P      | WB           |
| BiP           | Cell Signaling, 3177P      | WB           |
| XBP1s         | BioLegend, 647502          | WB           |
| CHOP          | Cell Signaling, 2895P      | WB           |
| DNAJB4        | Santa Cruz, sc-100711      | WB           |
| GAPDH         | Santa Cruz, sc-25778 HRP   | WB           |

## Supplementary Figure 1

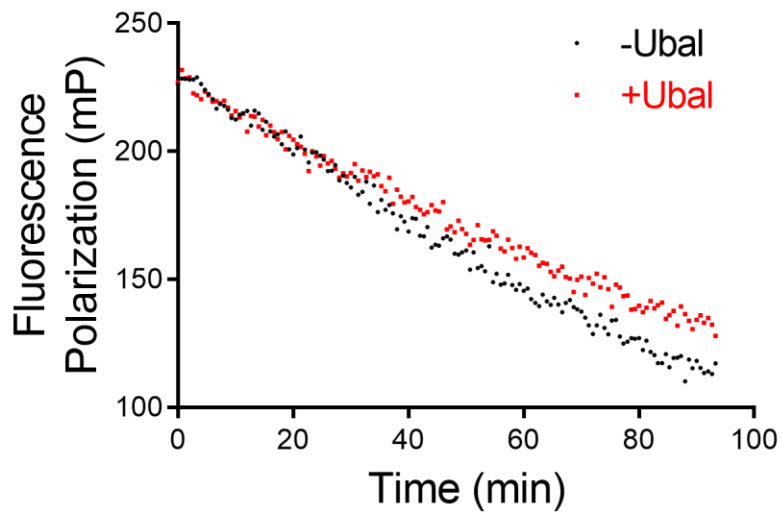

**Supplementary Figure 1: Ub aldehyde has little effect on the kinetics of Ub<sub>4</sub>peptide<sup>OG</sup> cleavage.** Shown are kinetic curves from the Rpn11 assay performed in the absence (black) or presence (red) of 1  $\mu$ M Ub aldehyde.

## Supplementary Figure 2

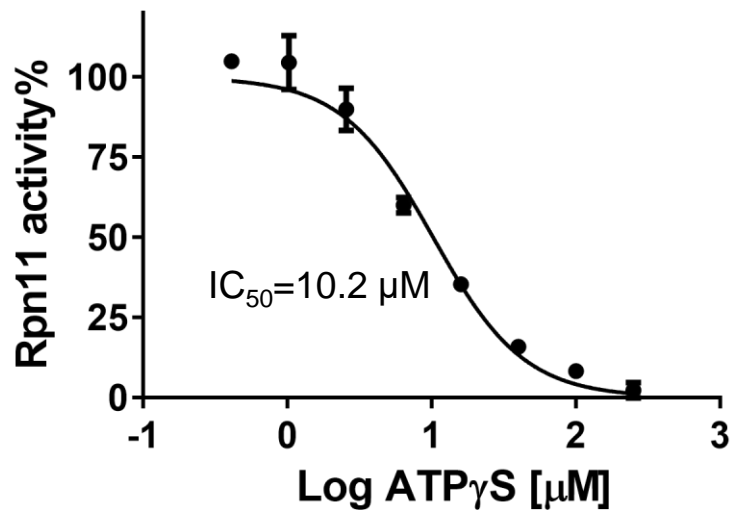

**Supplementary Figure 2: Cleavage of Ub<sub>4</sub>peptide<sup>OG</sup> requires ATP hydrolysis.** The  $IC_{50}$  for inhibition of Rpn11 activity by non-hydrolyzable ATP $\gamma$ S was determined. Error bars represent s.d., n=4



### Supplementary Figure 3

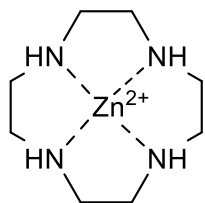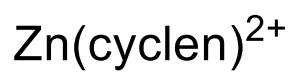

Supplementary Figure 3: Structure of  $\text{Zn(cyclen)}^{2+}$

## Supplementary Figure 4

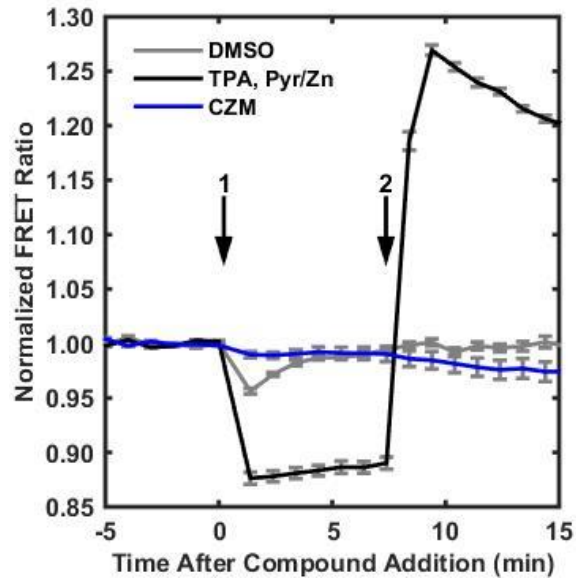

**Supplementary Figure 4: Capzimin does not alter cellular zinc.** Cells were treated with 0.5% DMSO (gray, n=11 cells), 50  $\mu$ M TPA (black, n=12 cells), or CZM 10  $\mu$ M (blue, n=11 cells) at arrow 1. At arrow 2, TPA-treated cells were washed and treated with 0.75  $\mu$ M pyrithione and 12  $\mu$ M buffered zinc solution (Pyr/Zn).

## Supplementary Figure 5

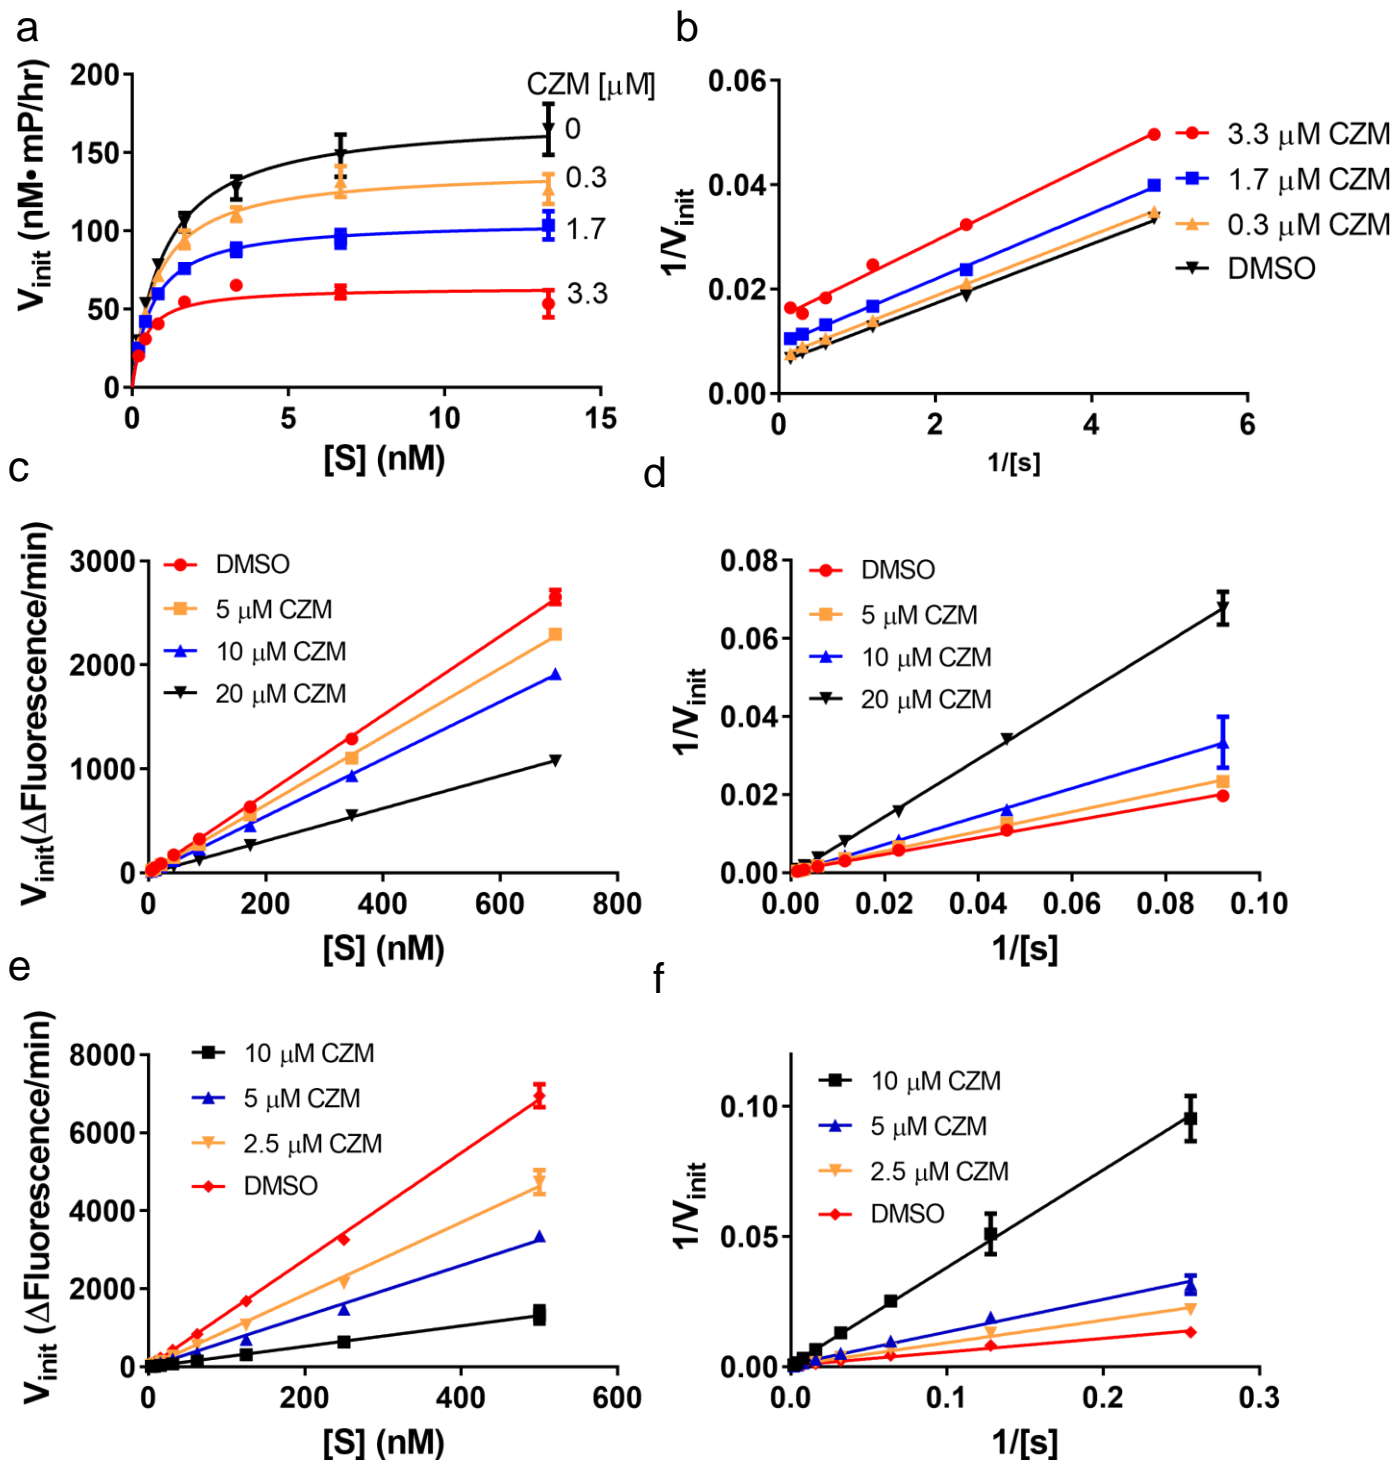

**Supplementary Figure 5: CZM is an uncompetitive inhibitor of Rpn11 (proteasome holoenzyme), but a competitive inhibitor of AMSH and BRCC36.** Shown are the Michaelis-Menten curves (a, c, e) or Lineweaver-Burke plots (b, d, f) of Rpn11 (a, b), AMSH (c, d) or BRCC36 (e, f) activity assay in the presence of different concentrations of CZM. Error bars represent s.d., n=3.

## Supplementary Figure 6

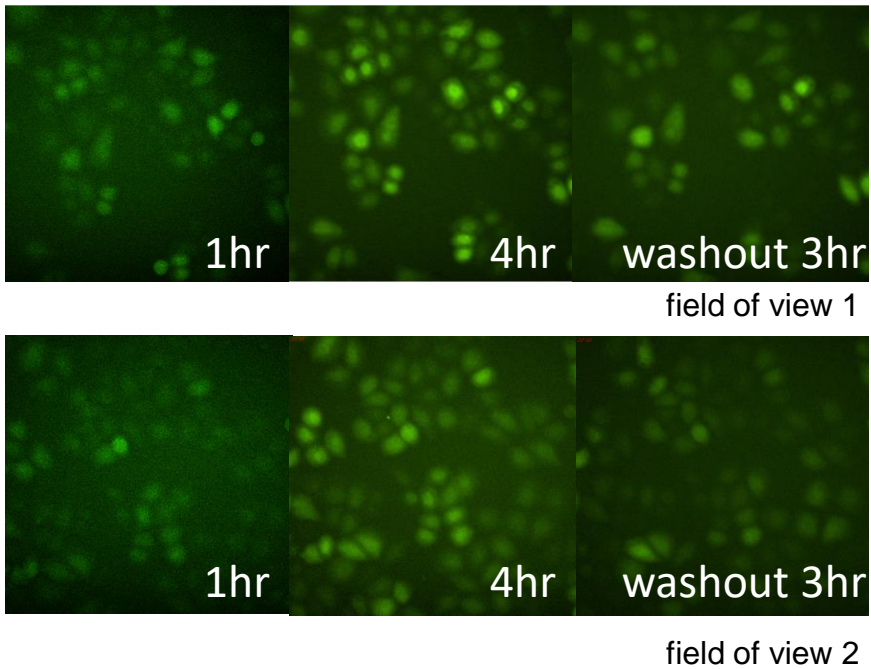

**Supplementary Figure 6: Capzimin reversibly inhibits the proteasome in cells.** Shown are fluorescence images of cells taken at different time points (as indicated) after treatment with 4 $\mu$ M of **CZM** or washout of **CZM**.

## Supplementary Figure 7

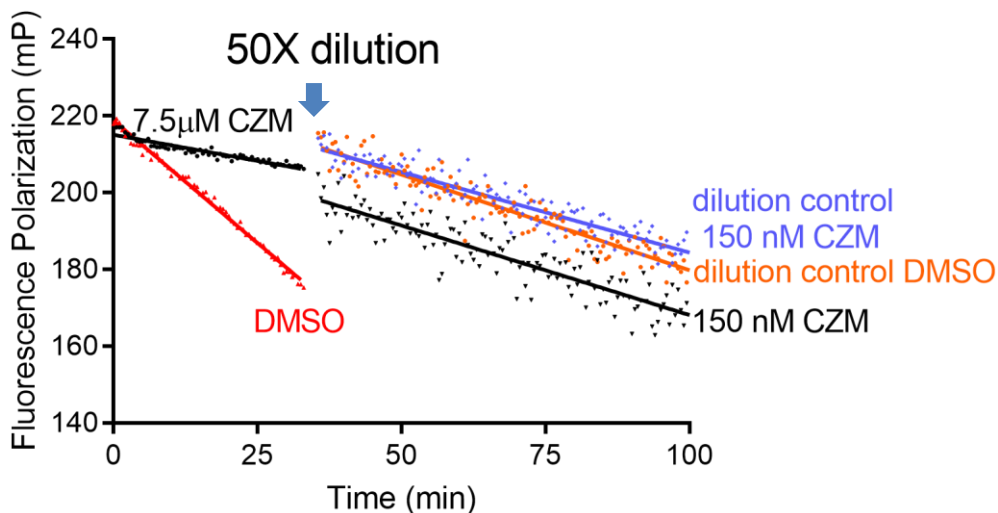

**Supplementary Figure 7: Capzimin is a reversible inhibitor in vitro.** Shown is the fluorescence polarization kinetics before and after 50X dilution. Before dilution, high concentration of CZM (black) showed >80% inhibition of Rpn11 activity compared to DMSO control (red). After 50X dilution, CZM (black) showed <10% inhibition of Rpn11 activity compared to the DMSO control (orange). A pre-diluted sample (blue) with same concentration of proteasome and CZM served as dilution control.

## Supplementary Figure 8

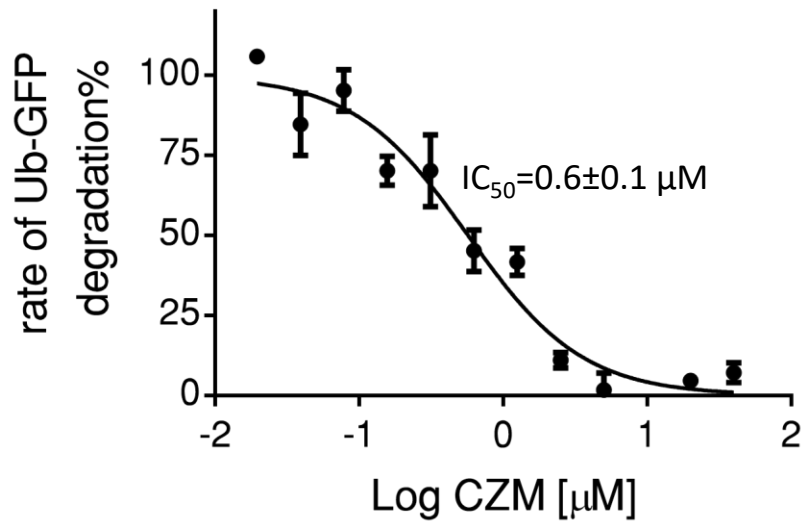

**Supplementary Figure 8. Capzimin block the clearance of accumulated Ub<sup>G76V</sup>GFP.** The degradation rate of Ub<sup>G76V</sup>-GFP was measured at different concentrations of capzimin by cycloheximide chase assay. Error bars represent s.d., n=3

## Supplementary Figure 9

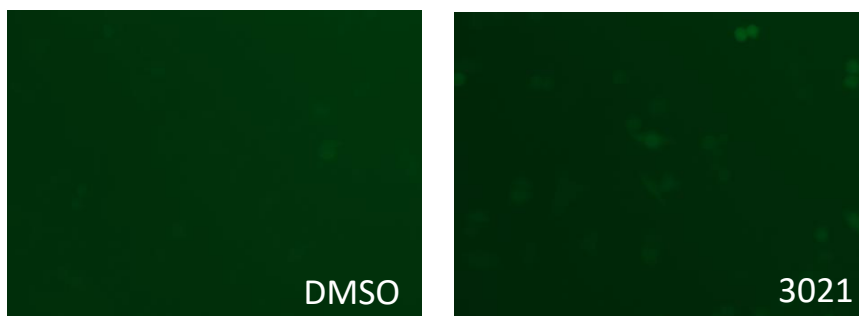

**Supplementary Figure 9. 3021 has little effect on Ub<sup>G76V</sup>GFP accumulation.** Shown is a fluorescence image of cells taken 4 hours after treatment with DMSO or 5  $\mu$ M of **3021**.

## Supplementary Figure 10

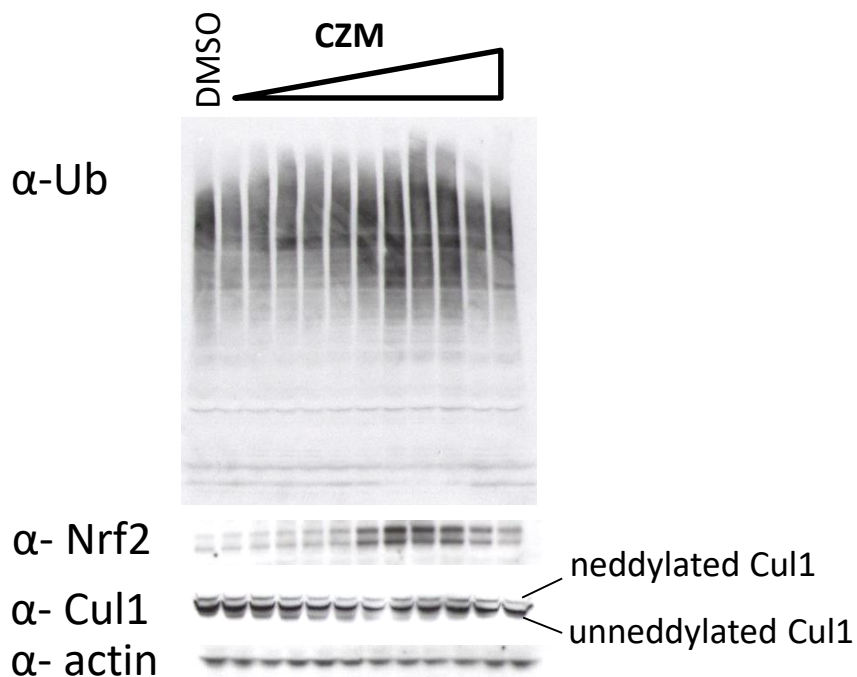

**Supplementary Figure 10: Capzimin treatment induces accumulation of polyubiquitinated species and Nrf2 in 293T cells.** 293T cells were treated for 2 hours with different concentrations (10 nM to 100  $\mu$ M) of capzimin and cell lysates were fractionated by SDS-PAGE and immunoblotted with antibodies against ubiquitin, Nrf2, Cul1 and actin, as indicated.



## Supplementary Figure 11

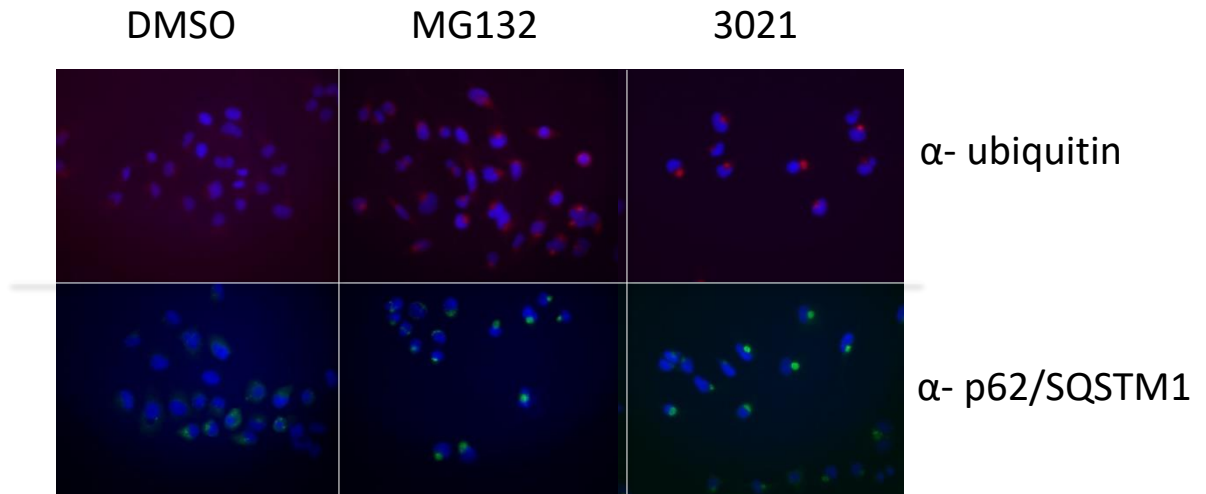

**Supplementary Figure 11: 3021 induces aggresome formation.** A549 cells were treated with DMSO, 5  $\mu$ M MG132 or 10  $\mu$ M **3021** for 15 hours before being fixed and stained with antibodies against ubiquitin or p62/SQSTM1.

## Supplementary Figure 12

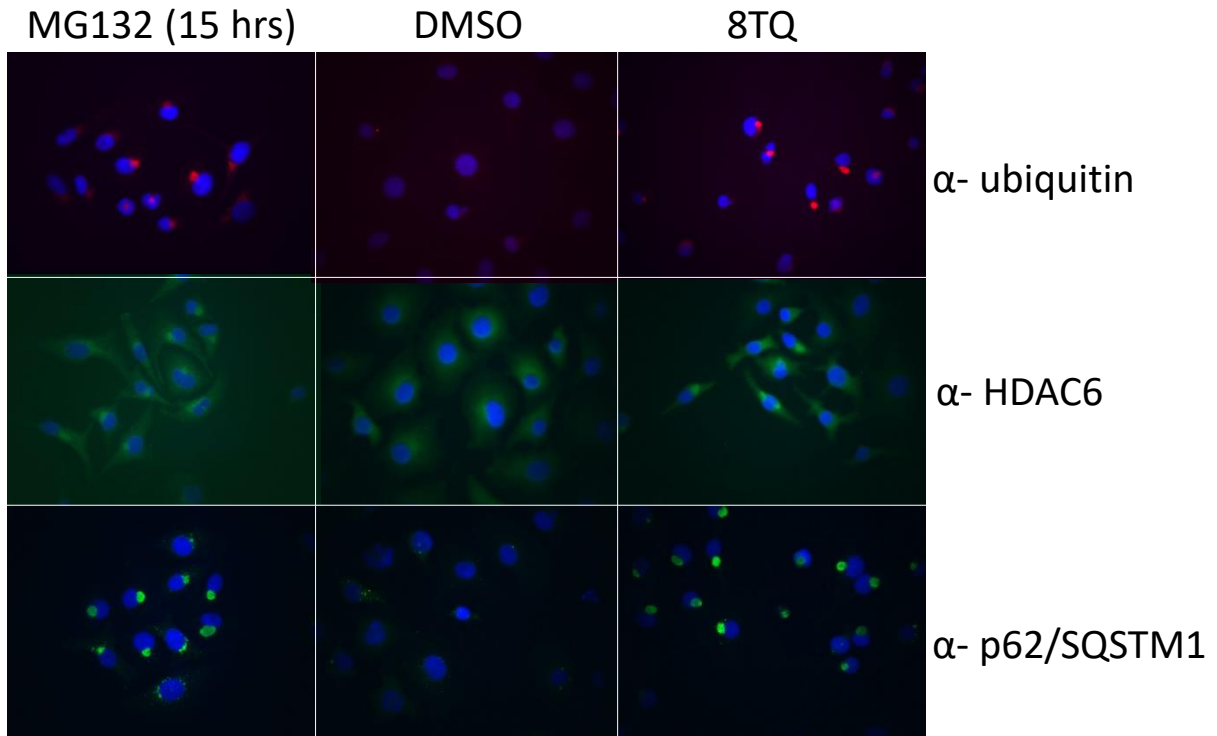

**Supplementary Figure 12: 8TQ prevents the clearance of aggresomes.** A549 cells were treated with 5  $\mu$ M MG132 for 15 hours to induce aggresome formation. MG132 was then washed away. The cells were treated with DMSO or 5  $\mu$ M 8TQ for 24 hours before being fixed and stained with antibodies against ubiquitin, HDAC6, or SQSTM1.

### Supplementary Figure 13

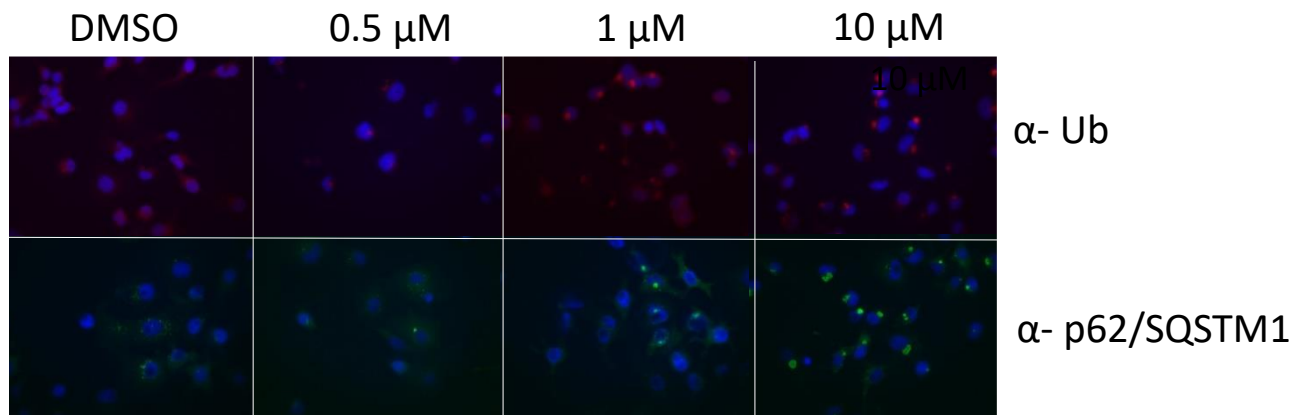

**Supplementary Figure 13: 3021 prevents the clearance of aggresomes.** A549 cells were treated with 5  $\mu\text{M}$  MG132 for 15 hours to induce aggresome formation. MG132 was then washed away and cells were treated with DMSO or different concentration of **3021** for 24 hours before being fixed and stained with antibodies against ubiquitin or SQSTM1.

## Supplementary Figure 14

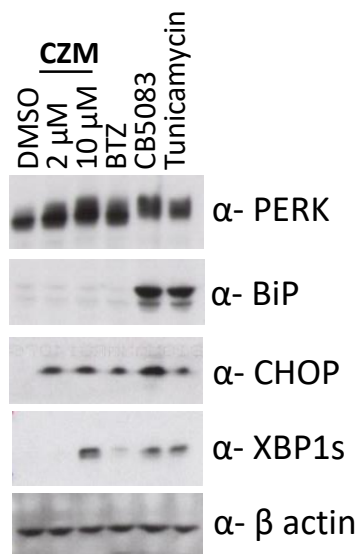

**Supplementary Figure 14: Capzimin induces an unfolded protein response in 293T cells.** 293T cells were treated for 8 hours with different concentrations of Capzimin (2 or 10  $\mu$ M), BTZ (1  $\mu$ M), the p97/VCP inhibitor CB5083 (10  $\mu$ M), or Tunicamycin (2  $\mu$ g/ml) and cell lysates were fractionated by SDS-PAGE and immunoblotted with antibodies against PERK, Bip, Xbp1s, CHOP and actin, as indicated.

## Supplementary Figure 15

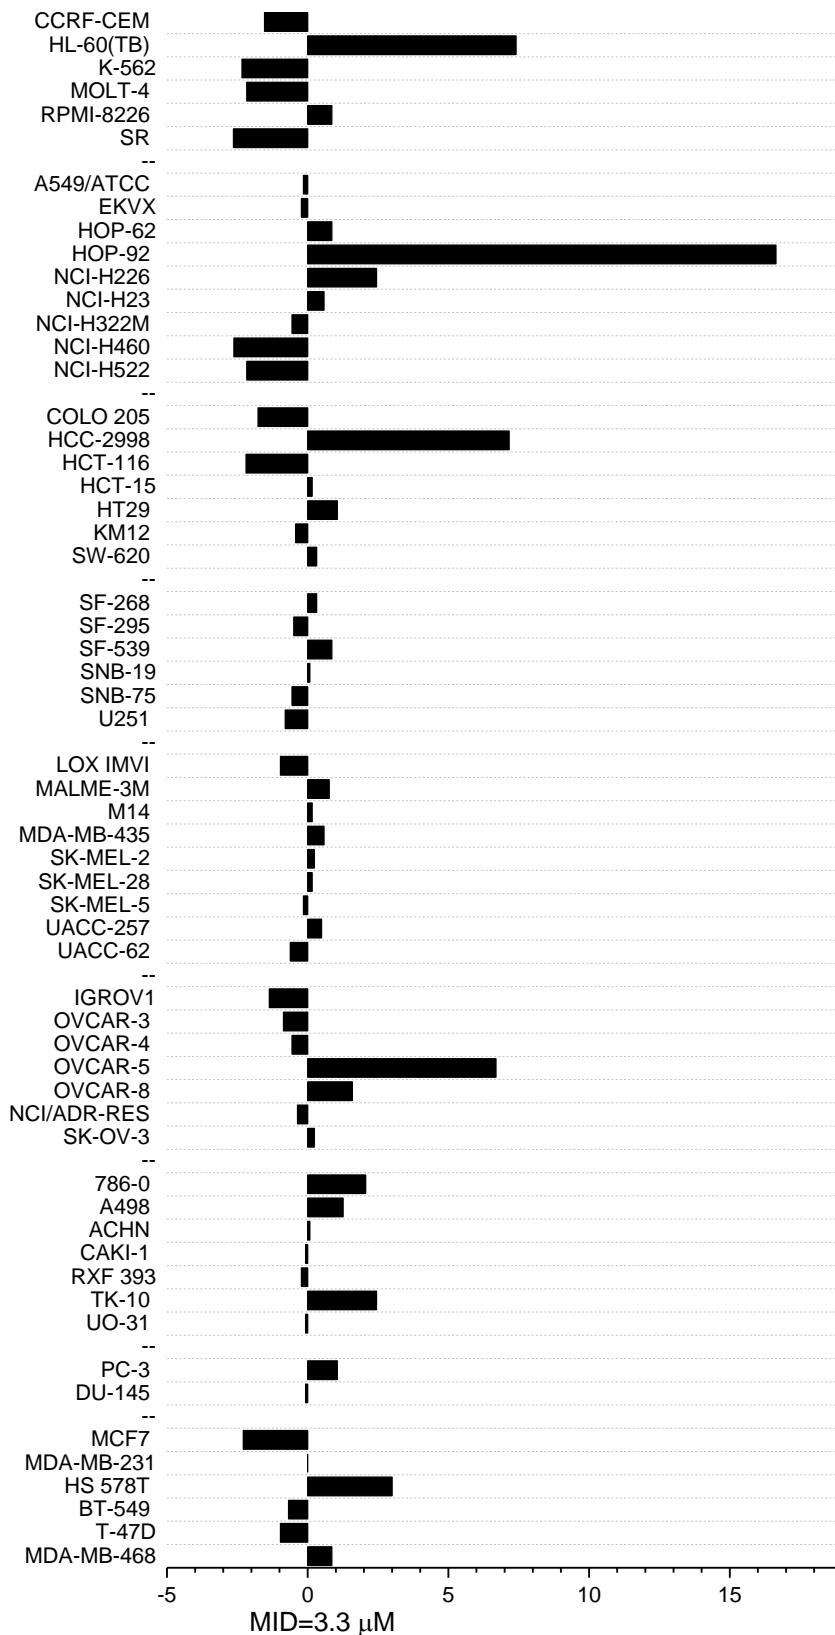

**Supplementary Figure 15: Summary of GI<sub>50</sub> values from NCI60 screen.** The average GI<sub>50</sub> (3.3 μM) was set to zero, and the sensitivity of individual cell types relative to the average is plotted on a linear scale.

## Supplementary Figure 16

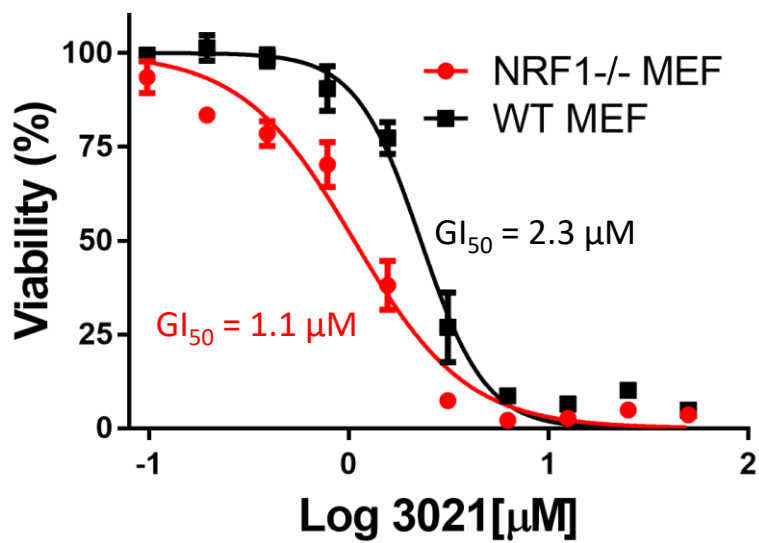

**Supplementary Figure 16: Cells lacking *Nrf1* are more sensitive to 3021.** WT (black) or *nfe2l1*<sup>-/-</sup> MEF cells (red) were treated with different concentrations of 3021 for 72 hours and then mixed with CellTiter-Glo reagent to quantify viable cells. Measured luminescence values were normalized to DMSO control and data were fitted to a dose-response equation to determine the GI<sub>50</sub>. Error bars represent s.d., n=3.

## Supplementary Figure 17

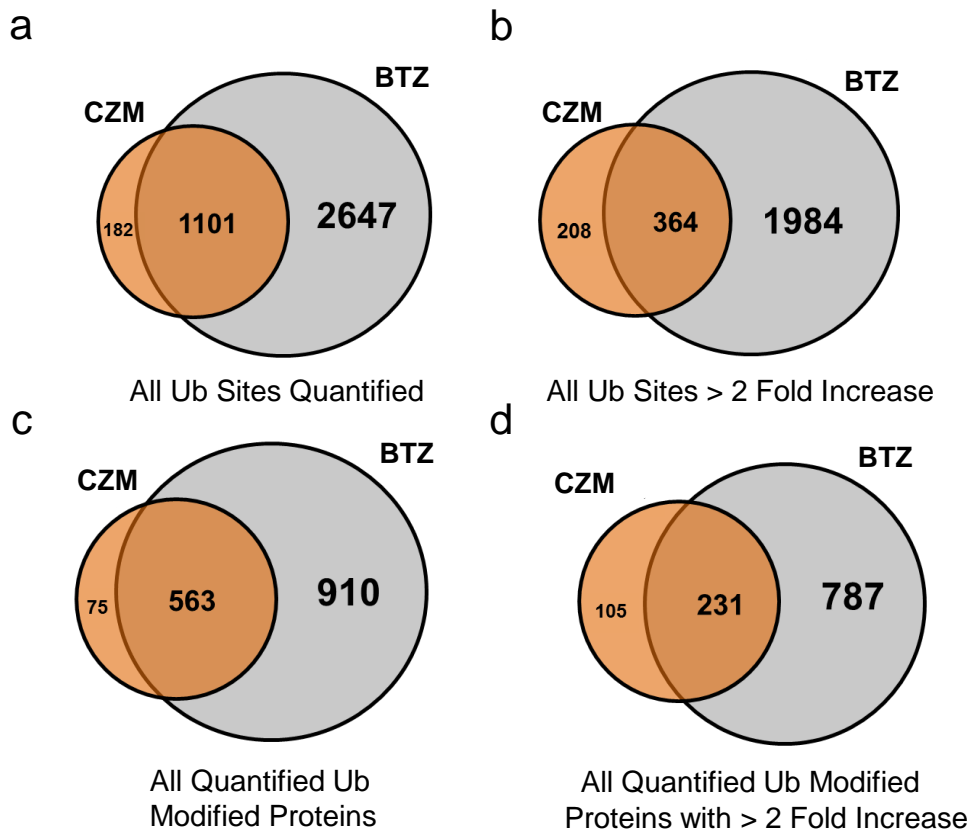

**Supplementary Figure 17: Comparison of the effects of CZM and BTZ treatment on ubiquitination site occupancy and protein level.** Venn diagram of the data from the proteomic experiment, showing comparison of the effects of capzimin (orange) and bortezomib (gray) on ubiquitination sites (a, b) and protein levels (c, d).

## Supplementary Figure 18

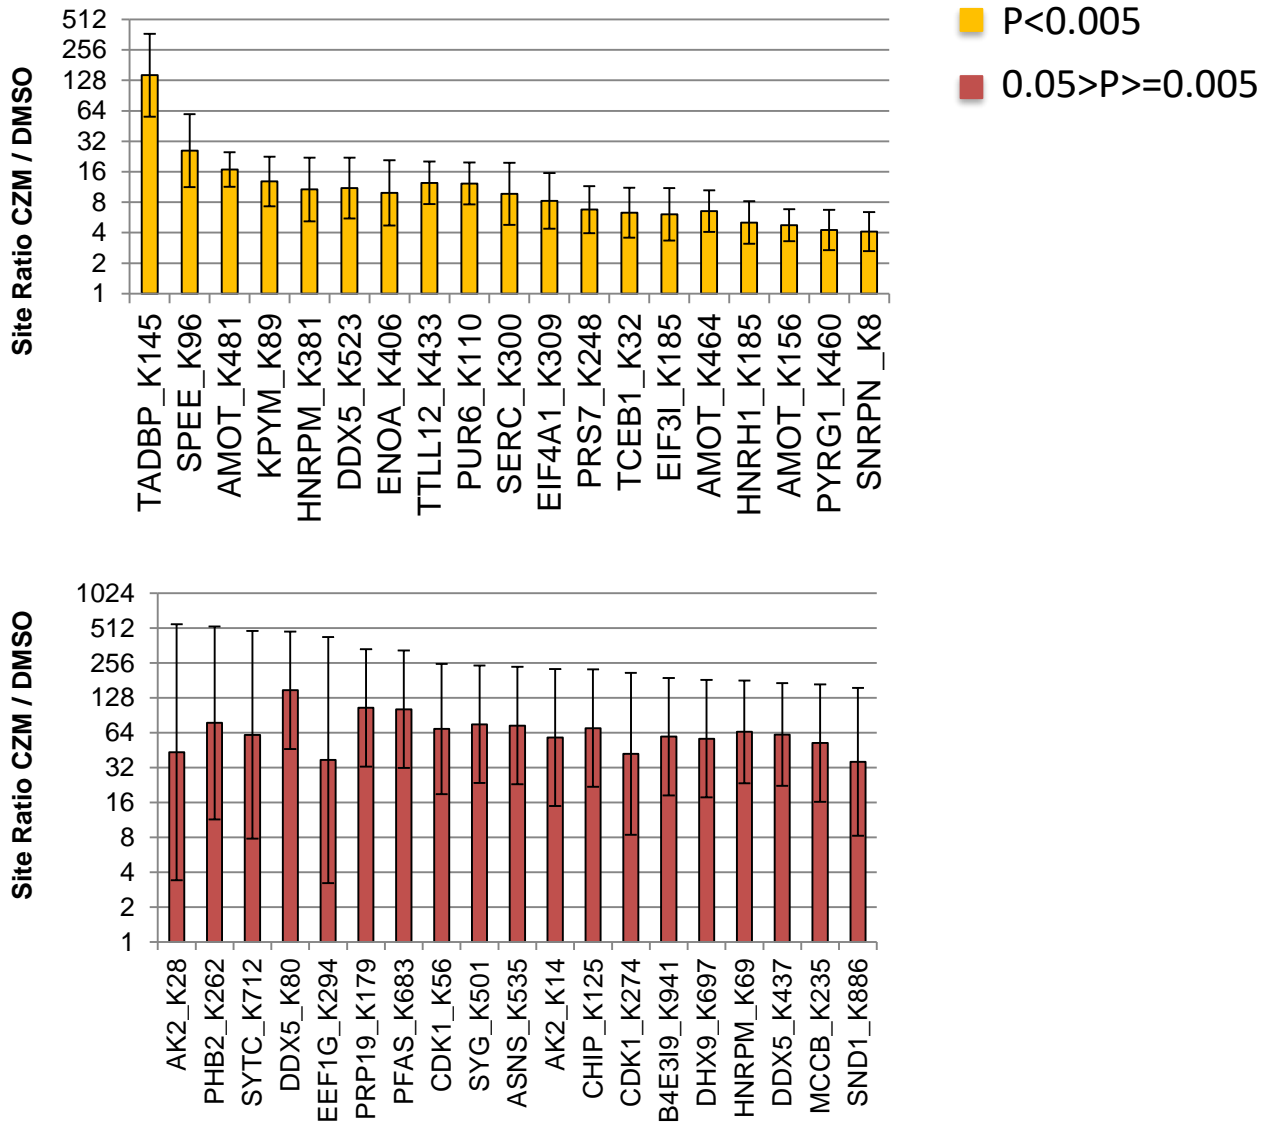

**Supplementary Figure 18: Largest changes in ubiquitination site occupancy upon treatment with Capzimin .** Bar graphs of the data from the proteomic experiment, showing the ubiquitination sites that showed the largest change in occupancy upon treatment with capzimin. Top panel: sites with p-value  $\leq 0.005$ . Bottom panel: sites with p-value between 0.05 and 0.005.



## Supplementary Figure 19

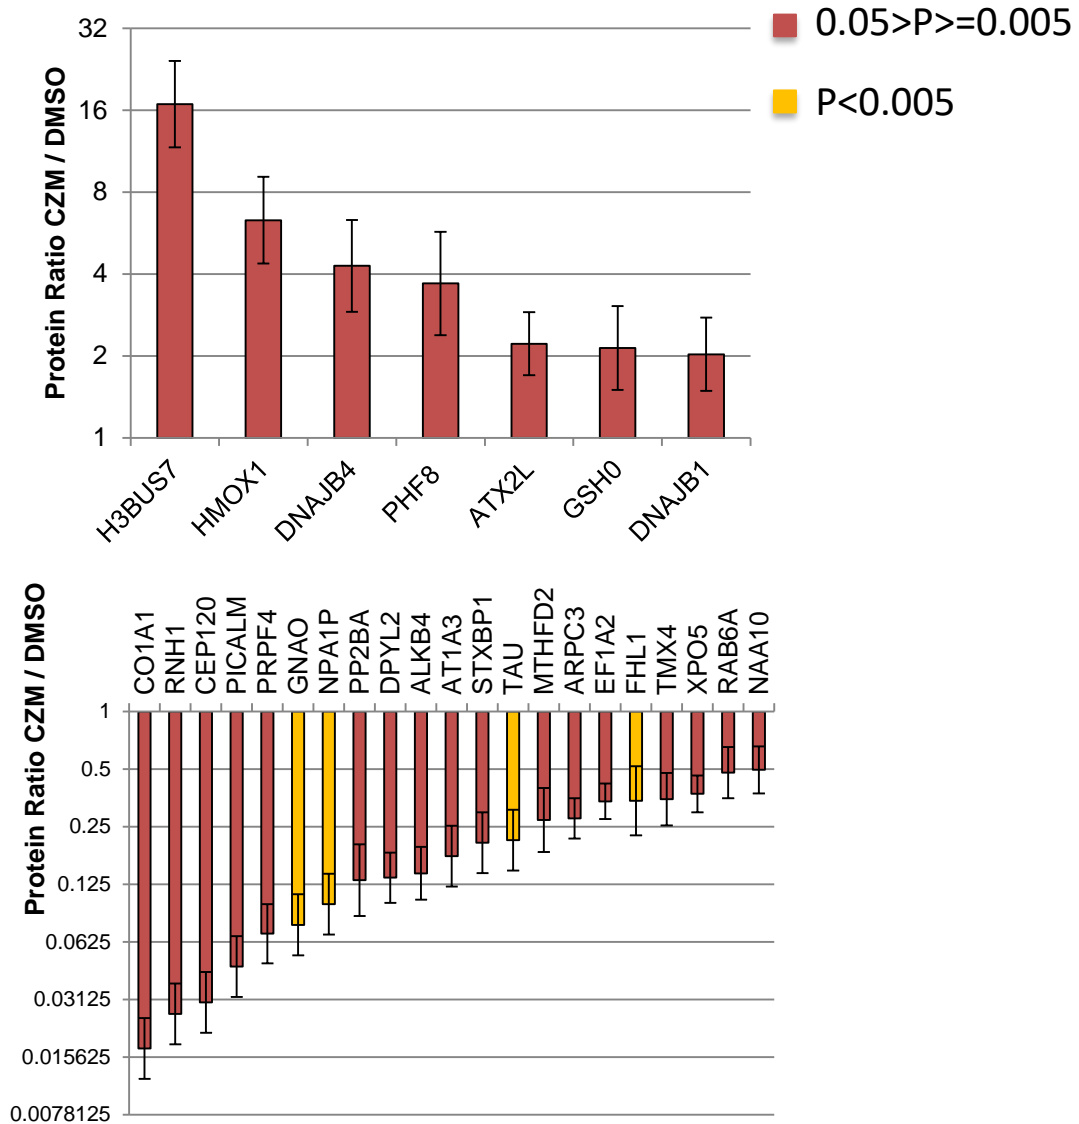

**Supplementary Figure 19: Largest changes in protein levels upon treatment with capzimin.** Bar graphs of the data from the proteomic experiment, showing the proteins that showed the largest change in abundance upon treatment with capzimin. Top panel: proteins that increased in level. Bottom panel: proteins that decreased in level. Yellow bars: proteins with p-value  $\leq 0.005$ . Red bars: proteins with p-value between 0.05 and 0.005.

## Supplementary Figure 20

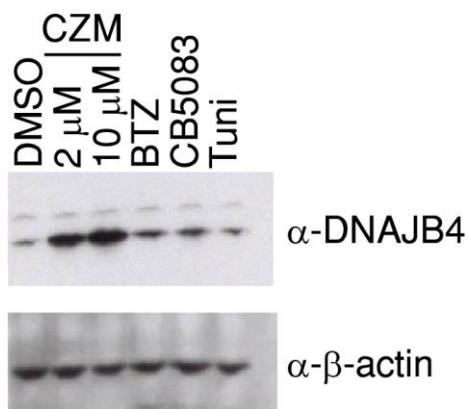

**Supplementary Figure 20: Capzimin promoted accumulation of DNAJB4.** 293T cells were treated with different concentrations of capzimin (2 or 10  $\mu$ M), BTZ (1  $\mu$ M), CB5083 (10  $\mu$ M), or Tunicamycin (2  $\mu$ g/ml) for 8 hrs. Western blot analyses were performed using antibodies against DNAJB4 and  $\beta$ -actin.

Supplementary Figure 21

For Fig. 3d

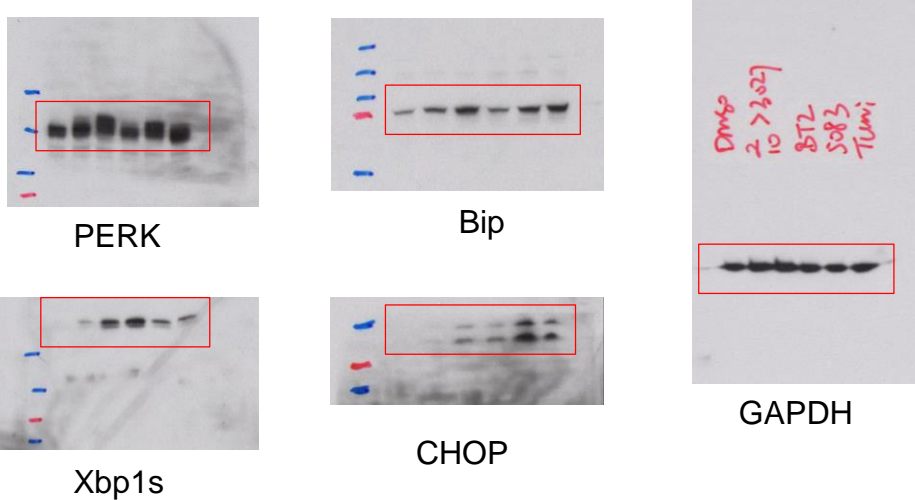

For Fig. 4c

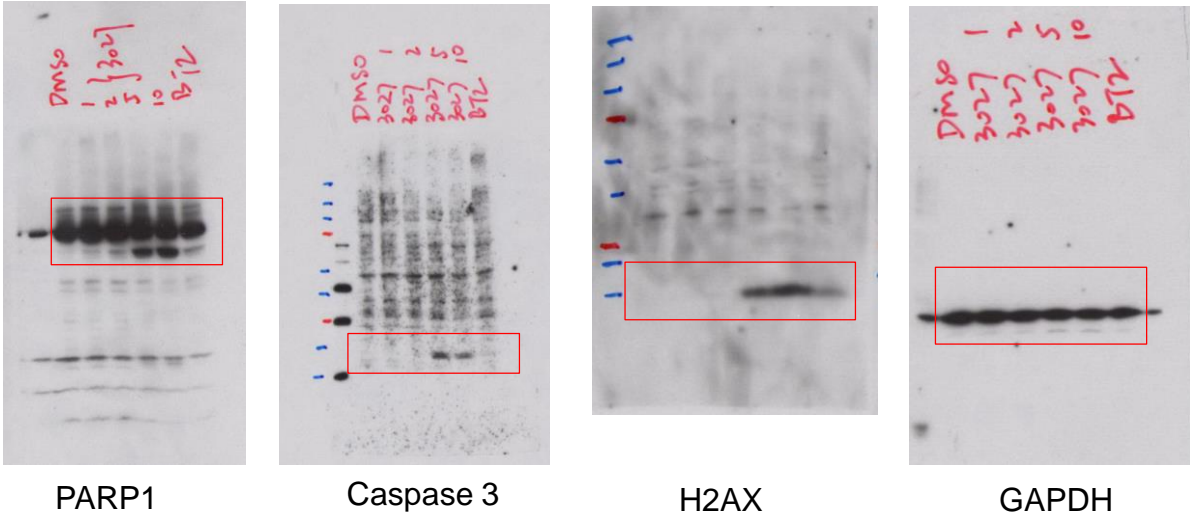

Supplement: NIHMS877167-supplement-ESI.pdf [file NIHMS877167-supplement-ESI.pdf]
